# Supplementary material for: S100P enhances the motility and invasion of human trophoblast cell lines
Source: PubMed Central journal article supplement (PMC6068119; doi:10.1038/s41598-018-29852-2), 2018-07-31
Supplement: 41598_2018_29852_MOESM2_ESM.pdf [file 41598_2018_29852_MOESM2_ESM.pdf]

# **S100P enhances the motility and invasion of human trophoblast cell lines**

Maral E. A. Tabrizi, Tara Lancaster, Thamir M. Ismail, Athina Georgiadou, Ankana Ganguly, Jayna Mistry, Keqing Wang, Philip S. Rudland, Shakil Ahmad and Stephane R. Gross

CD49F

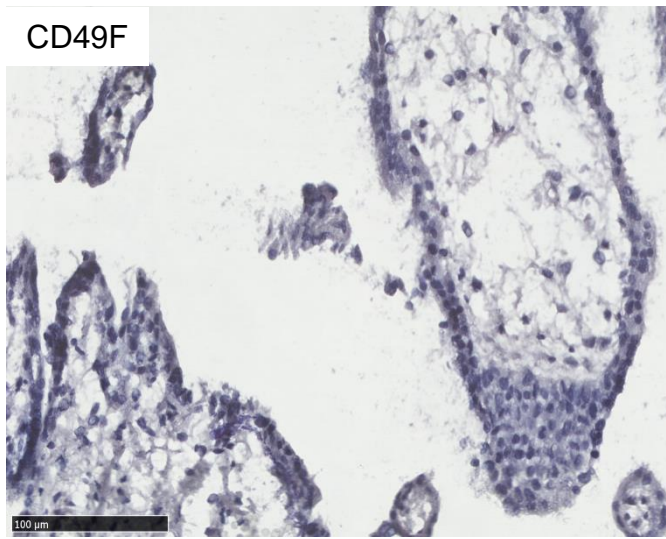

HLA-G

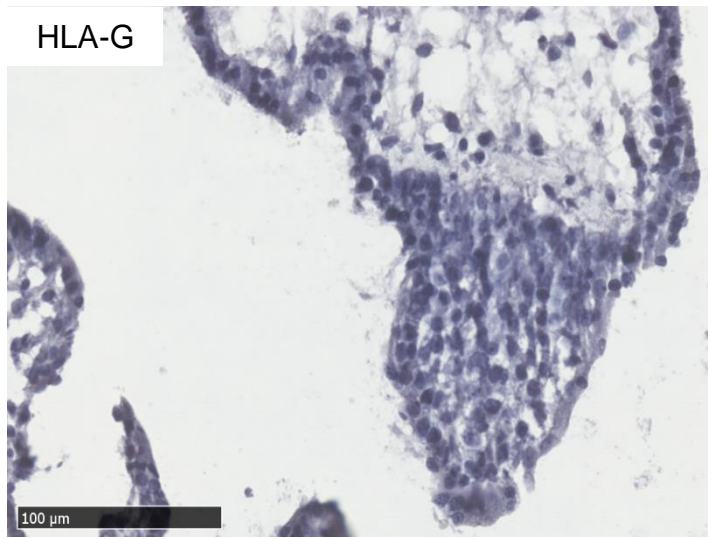

CK7

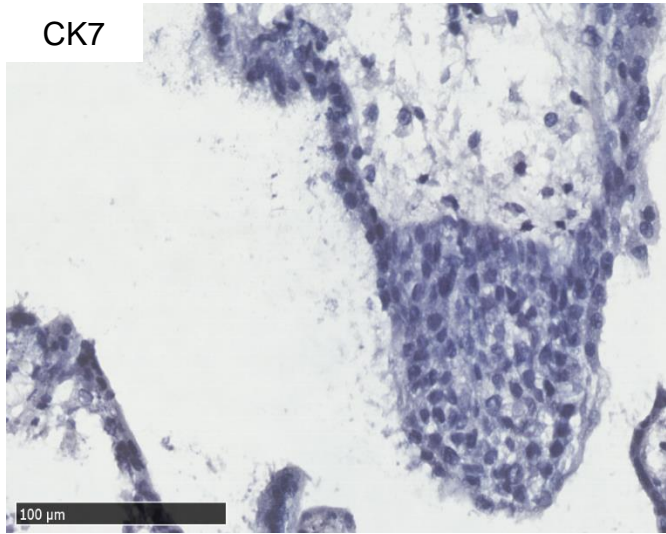

S100P

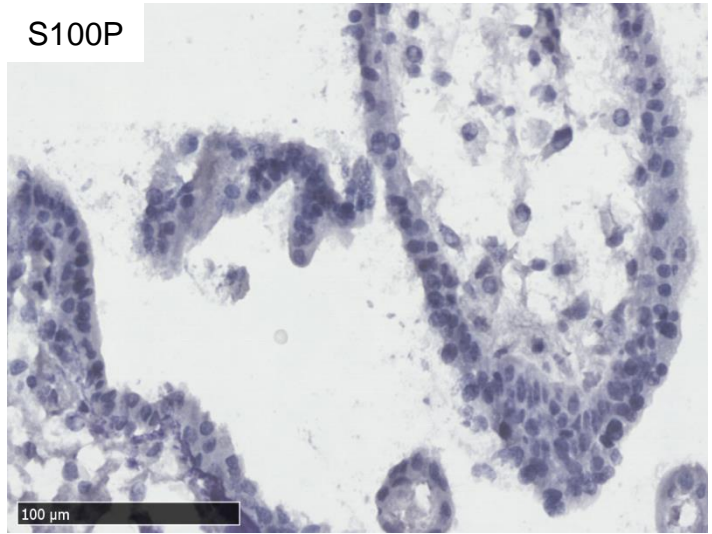

**Figure S1**

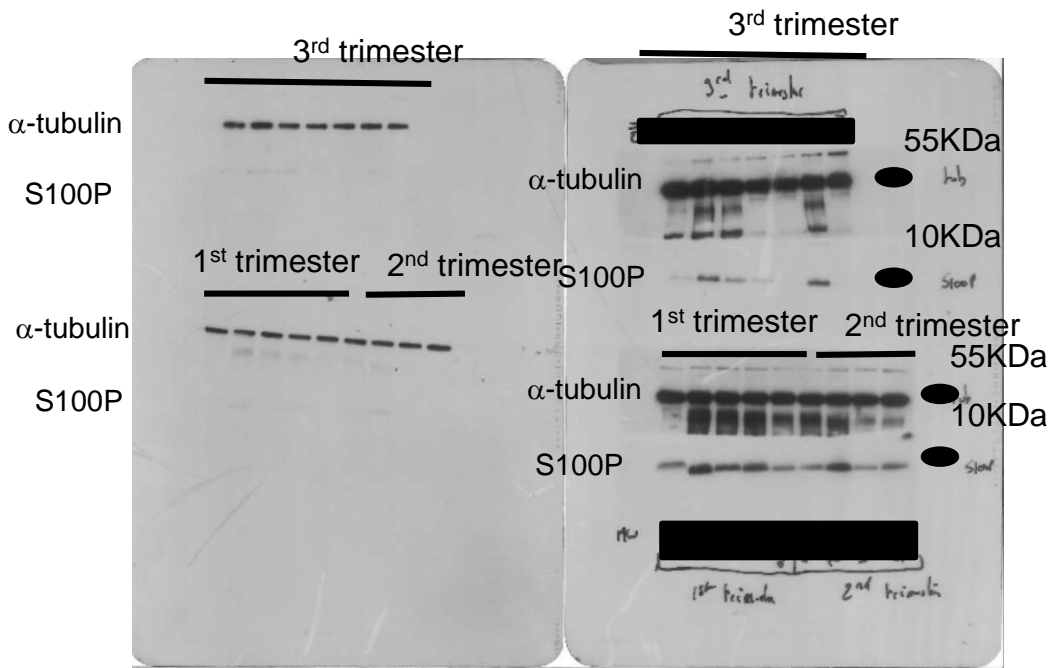

**Figure S2**

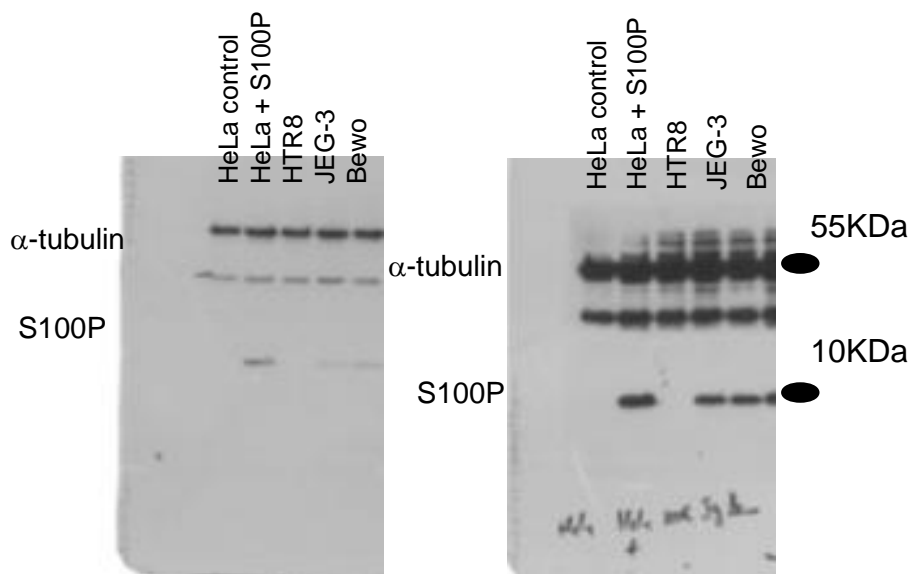

**Figure S3**

**A**

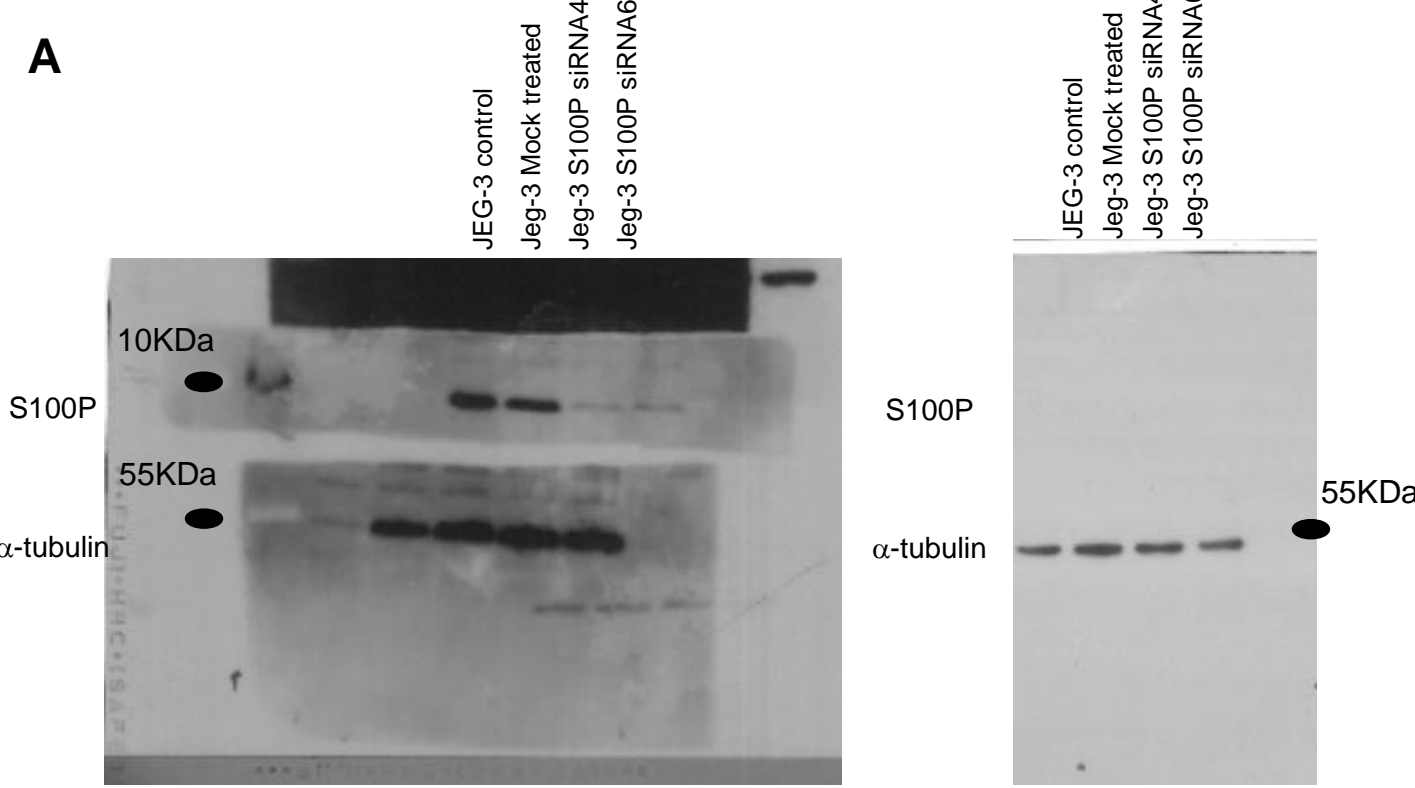

**B**

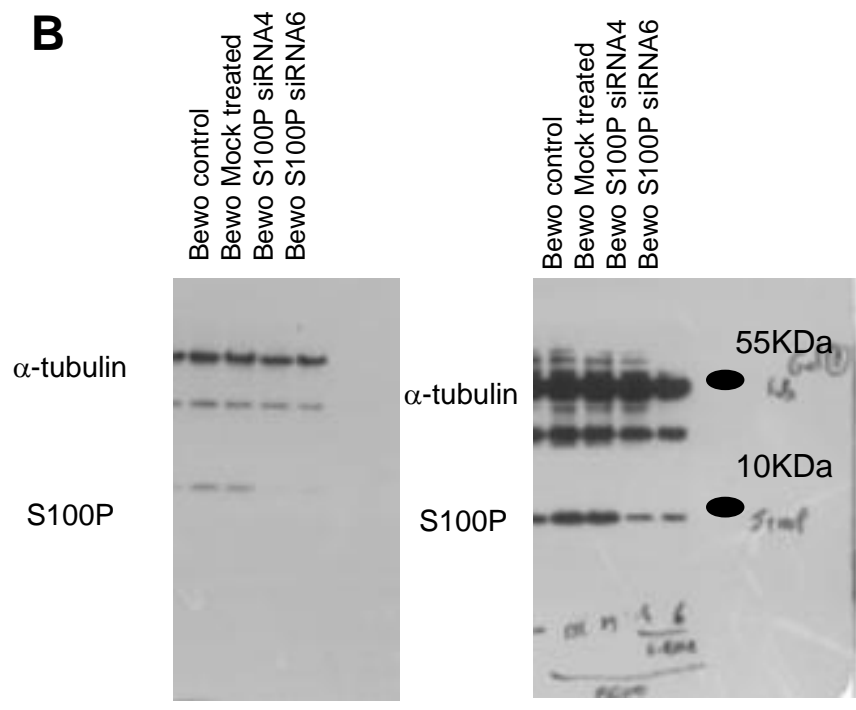

**Figure S4**

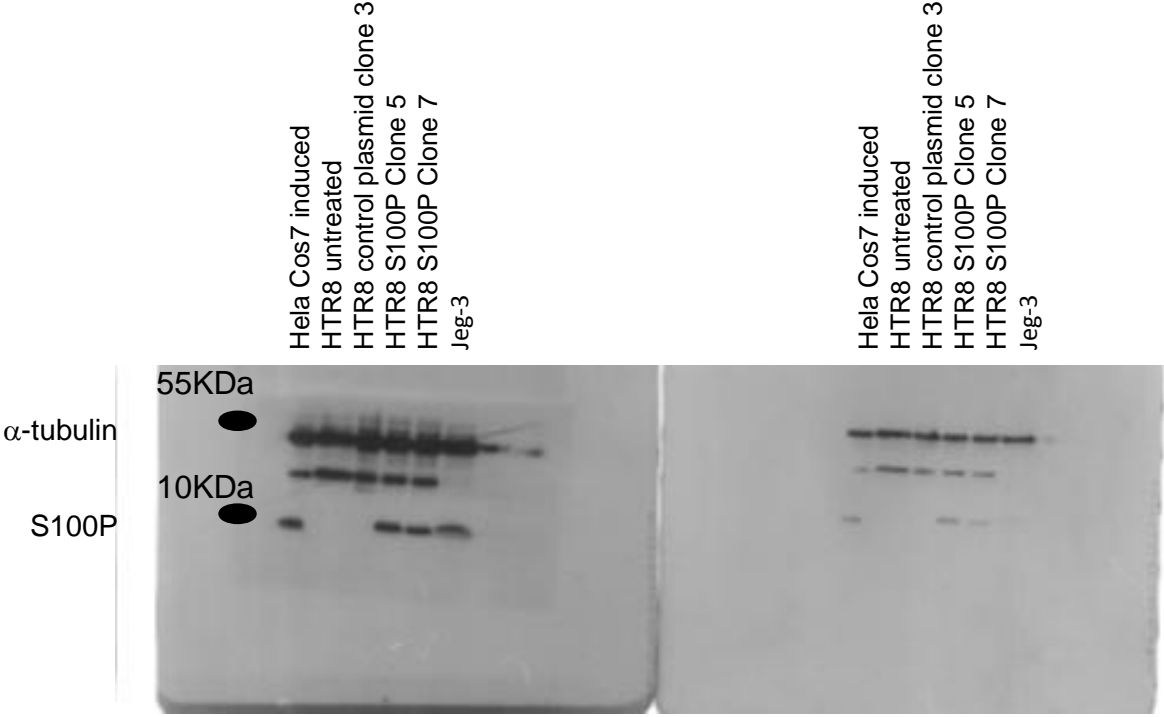

**Figure S5**
